# Supplementary material for: Protocol for a systematic review on systemic and skin toxicity of important hazardous hair and nail cosmetic ingredients in hairdressers
Source: PubMed Central journal article supplement — BMJ Open. 2021 Dec 6;11(12):e050612. doi: 10.1136/bmjopen-2021-050612 (PMC8650303; doi:10.1136/bmjopen-2021-050612), 2021-12-06
Supplement: bmjopen-2021-050612supp001.pdf [file bmjopen-2021-050612supp001.pdf]

## Appendix A: Substance identifiers

### *p*-Phenylenediamine (INCI)

Additional CAS numbers include salts, including the sulfate. Shorthand is **PPD**.

- *p*-Phenylenediamine
- PPD
- 1,4-Benzenediamine
- (4-Aminophenyl)amine
- 1,4-Diaminobenzene
- 1,4-Phenylenediamine
- 4-Aminoaniline
- 4-Phenylenediamine
- C.I. 76060
- C.I. Developer 13
- C.I. Oxidation Base 10
- Paramine
- *p*-Aminoaniline
- *p*-Benzenediamine
- *p*-Diaminobenzene
- 106-50-3
- 624-18-0
- *p*-Phenylenediamine sulfate
- 16245-77-5

### Toluene-2,5-diamine (INCI)

Salt, sulfate predominantly, also included. Shorthand **PTD**.

- Toluene-2,5-diamine
- 1,4-Benzenediamine, 2-methyl-
- 2-Methyl-1,4-benzenediamine
- 1,4-Diamino-2-methylbenzene
- 1-Methyl-2,5-diaminobenzene
- 2,5-Diaminotoluene
- 2,5-Diaminotoluol
- 2-Methyl-1,4-phenylenediamine
- 2-Methyl-*p*-phenylenediamine
- 4-Amino-2-methylaniline

- 4-Amino-3-methylaniline
- C.I. 76042
- Toluylene-2,5-diamine
- *p*-Toluenediamine
- 95-70-5
- Toluene-2,5-diamine sulfate
- 615-50-9

### 2-Methoxymethyl-*p*-phenylenediamine (INCI)

Shorthand: **mePPD**.

- 2-Methoxymethyl-*p*-phenylenediamine
- 337906-36-2
- 2-Methoxymethyl-PPD
- 1,4-Benzenediamine, 2-(methoxymethyl)
- 1,4-Benzenediamine, 2-(methoxymethyl)-, sulfate
- 337906-37-3
- 2-(Methoxymethyl)-1,4-benzenediamine
- 1,4-Diamino-2-(methoxymethyl)benzene
- 2-Methoxymethyl-1,4-benzenediamine
- 2-Methoxymethyl-1,4-diaminobenzene
- 2-Methoxymethyl-1,4-phenylenediamine

### Ammonium persulfate (INCI)

Shorthand: **APS**.

- Ammonium persulfate
- 7727-54-0
- Peroxydisulfuric acid ([ $(\text{HO})\text{S}(\text{O})_2$ ]<sub>2</sub>), diammonium salt (8CI,9CI)
- Ammonium peroxidodisulfate
- Ammonium peroxydisulfate
- Ammonium peroxydisulfate (( $\text{NH}_4$ )<sub>2</sub> $\text{S}_2\text{O}_8$ )
- Ammonium peroxydisulfate
- Bis(ammonium) peroxodisulfate
- Diammonium peroxydisulfate
- Diammonium peroxydisulphate
- Diammonium persulfate

### Potassium persulfate (INCI)

Shorthand: **PPS**.

- Potassium persulfate
- 7727-21-1
- Peroxydisulfuric acid ([ $(\text{HO})\text{S}(\text{O})_2$ ]<sub>2</sub>O<sub>2</sub>), dipotassium salt (9CI)
- Dipotassium peroxodisulfate
- Dipotassium peroxydisulfate
- Dipotassium persulfate
- Potassium dipersulfate
- Potassium peroxydisulfate
- Potassium peroxydisulfate (K<sub>2</sub>(S<sub>2</sub>O<sub>8</sub>))
- Potassium peroxydisulphate

### Sodium persulfate (INCI)

Shorthand: **SPS**.

- Sodium persulfate
- 7775-27-1
- Peroxydisulfuric acid ([ $(\text{HO})\text{S}(\text{O})_2$ ]<sub>2</sub>O<sub>2</sub>), disodium salt (8CI,9CI)
- Sodium peroxydisulfate (6CI)
- Disodium peroxodisulfate
- Disodium peroxydisulfate
- Disodium persulfate
- Sodium dipersulfate
- Sodium peroxodisulfate
- Sodium peroxydisulfate (Na<sub>2</sub>S<sub>2</sub>O<sub>8</sub>)
- Sodium persulfate (Na<sub>2</sub>S<sub>2</sub>O<sub>8</sub>)

### Glyceryl thioglycolate (INCI)

Shorthand: **GMTG**. Annex III/2b.

- glyceryl thioglycolate
- glyceryl monothioglycolate
- 30618-84-9
- Acetic acid, mercapto-, ester with glycerol (6CI)
- Acetic acid, mercapto-, monoester with 1,2,3-propanetriol (9CI)
- Acetic acid, mercapto-, monoester with glycerol (8CI)
- Glycerol monomercaptoacetate

### Ammonium thioglycolate (INCI)

Shorthand: **ATG**. Annex III/2a.

- Ammonium thioglycolate
- 5421-46-5
- Acetic acid, mercapto-, monoammonium salt (8CI,9CI)
- Ammonium mercaptoacetate
- Ammonium thioglycollate
- Thioglycolic acid ammonium salt

## 2-Hydroxyethyl methacrylate (INCI)

Shorthand: **HEMA**.

- 2-Hydroxyethyl methacrylate
- 868-77-9
- HEMA
- Methacrylic acid, 2-hydroxyethyl ester (6CI,8CI)
- Methacrylic acid, ester with glycol (7CI)
- 2-(Methacryloyloxy)ethanol
- 2-HEMA
- 2-Hydroxyethyl 2-methylprop-2-enoate
- Ethylene glycol methacrylate
- Ethylene glycol monomethacrylate
- Glycol methacrylate
- Glycol monomethacrylate
- $\beta$ -Hydroxyethyl methacrylate

## Ethyl cyanoacrylate

Shorthand: **ECA**.

- Ethyl cyanoacrylate
- 7085-85-0
- Acrylic acid, 2-cyano-, ethyl ester (6CI,7CI,8CI)
- 2-Cyano-2-propenoic acid ethyl ester
- 2-Cyanoacrylic acid ethyl ester
- Ethyl 2-cyanoacrylate
- Ethyl 2-cyanopropenoate
- Ethyl  $\alpha$ -cyanoacrylate
